# Supplementary material
Source: MDPI journal article supplement (https://www.mdpi.com/2073-4395/14/3/638)
Supplement: s1 [file s1]

**Ecological  
Importance**

Very high

High

Medium

Low

A

A

B

C

A

B

C

D

B

C

C

D

B

C

D

D

Low

Medium

High

Very high

**Pressure for water use**
